# Supplementary material for: Evidence of the Complexity of Gene Expression Analysis in Fish Wild Populations
Source: Hindawi journal article supplement (doi:10.1155/2017/1258396), 2017-01-01
Supplement: f1 [file 1258396.f1.pdf]

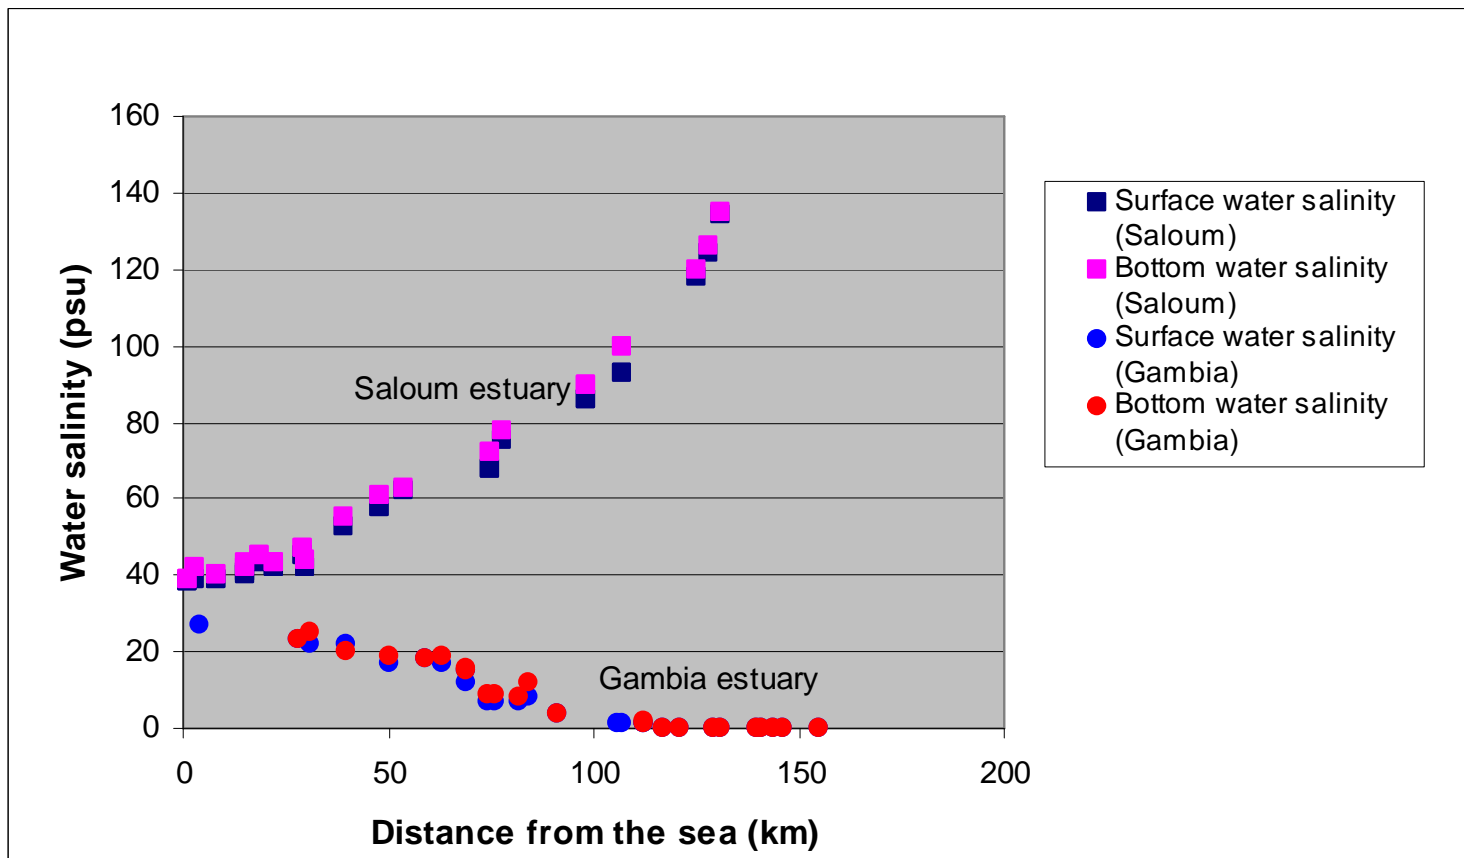

**Supplementary Figure 1:** Evolution of surface and bottom water salinity in the Saloum and Gambian estuaries

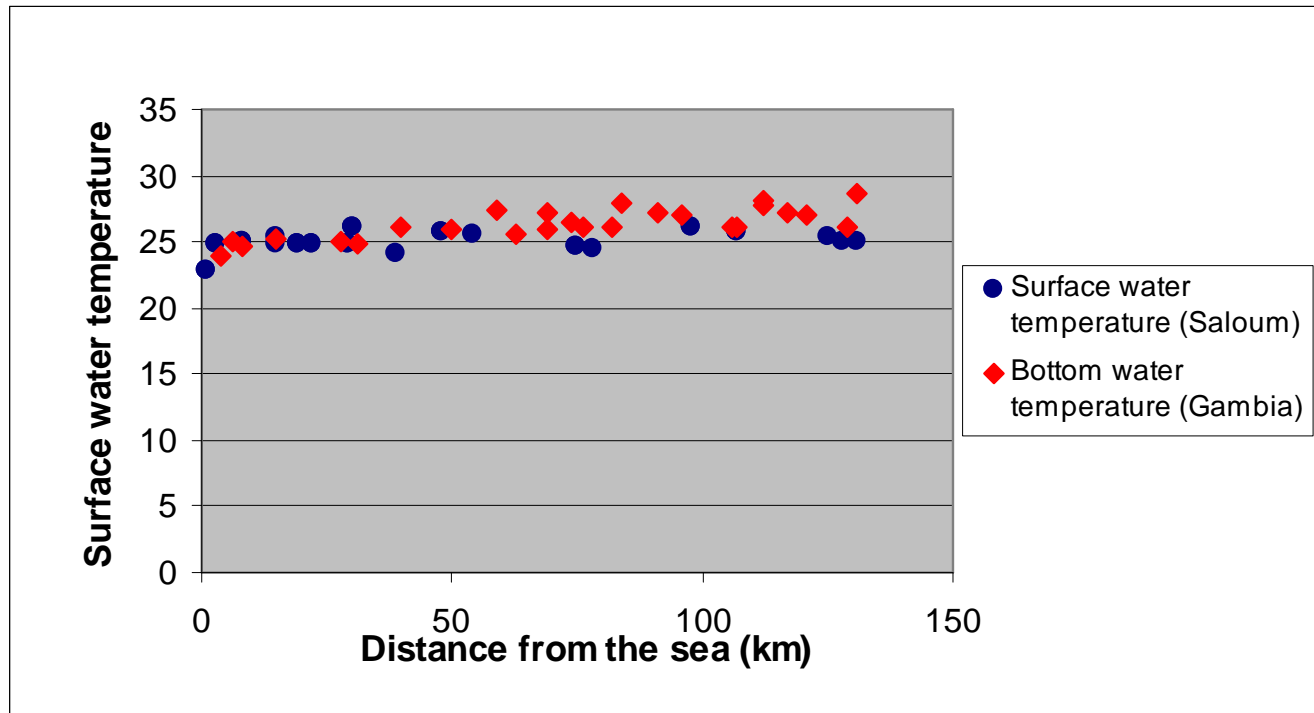

**Supplementary Figure 2:** Evolution of surface water temperature in the Saloum and Gambian estuaries.

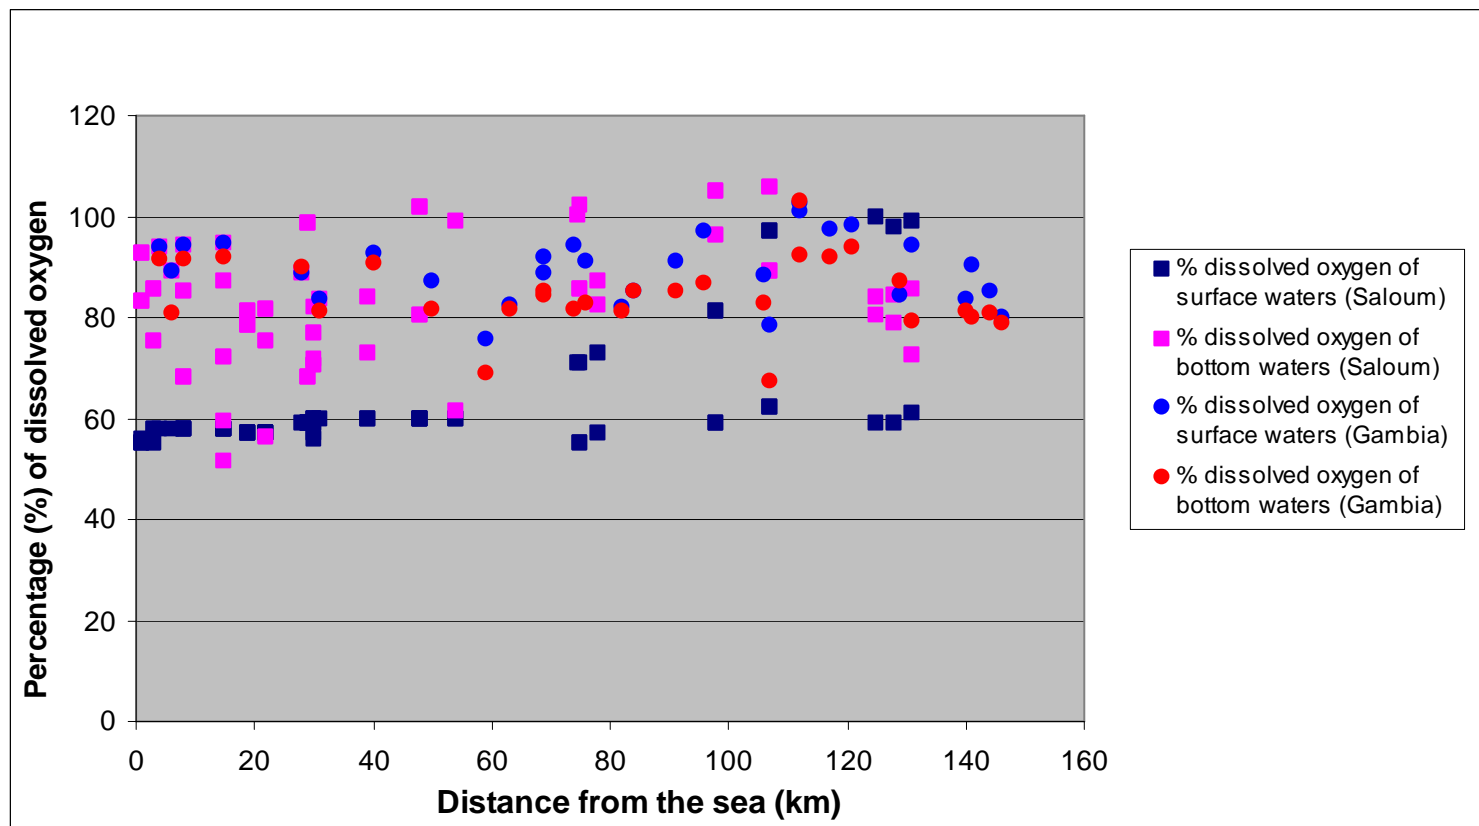

**Supplementary Figure 3:** Evolution of surface and bottom % dissolved oxygen of surface and bottom waters in the Saloum and Gambian estuaries.

**Supplementary Table 1:** Additional environmental data from Guiers Lake and Hann Bay

| Variable                     | Guiers Lake | Hann Bay |
|------------------------------|-------------|----------|
| Salinity (psu)               | 0           | 37-38    |
| Water temperature (°C)       | 24.9        | 25       |
| Oxygen (mg L <sup>-1</sup> ) | 6.7         | 4.84     |
